# Supplementary material for: In Vivo Neutralization of Myotoxin II, a Phospholipase A2 Homologue from Bothrops asper Venom, Using Peptides Discovered via Phage Display Technology
Source: PubMed Central journal article supplement — ACS Omega. 2022 Apr 25;7(18):15561–9. doi: 10.1021/acsomega.2c00280 (PMC9096979; doi:10.1021/acsomega.2c00280), 2022-04-25
Supplement: ao2c00280_si_001.pdf [file ao2c00280_si_001.pdf]

## Supporting Information

### *In vivo* neutralization of Myotoxin II, a phospholipase A<sub>2</sub> homolog from *Bothrops asper* venom, using peptides discovered via phage display technology

Andreas H. Laustsen<sup>1,2</sup>, Bengt H. Gless<sup>2</sup>, Timothy P. Jenkins<sup>1</sup>, Maria Meyhoff-Madsen<sup>2</sup>, Johanna Bjärtun<sup>2</sup>, Andreas S. Munk<sup>1</sup>, Saioa Oscoz<sup>1</sup>, Julián Fernández<sup>3</sup>, José María Gutiérrez<sup>3</sup>, Bruno Lomonte<sup>3</sup>, Brian Lohse<sup>2\*</sup>

<sup>1</sup>Department of Biotechnology and Biomedicine, Technical University of Denmark, Lyngby, Denmark

<sup>2</sup>Department of Drug Design and Pharmacology, University of Copenhagen, Copenhagen, Denmark

<sup>3</sup>Instituto Clodomiro Picado, Faculty of Microbiology, University of Costa Rica, San José, Costa Rica

Corresponding author: [brian.lohse.dk@gmail.com](mailto:brian.lohse.dk@gmail.com)

#### **Contents:**

**Figure S1: HPLC trace of TAMRA-JB006**

**Figure S2: SDS-pages gels for Myotoxin-II pulldown experiments**

S2

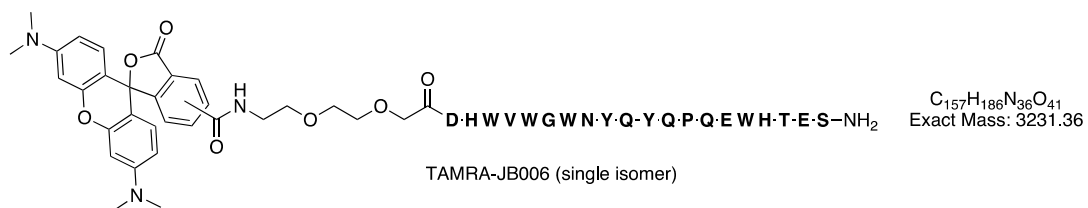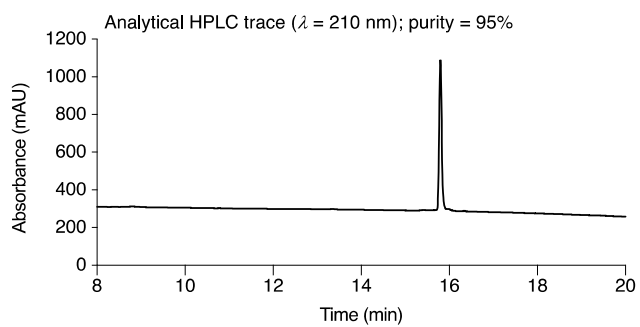

**Figure S1.** Structure of TAMRA-JB006 and analytical HPLC trace of purified TAMRA-JB006. The peptide was isolated as single TAMRA isomer but the identity of the isomer was not resolved.

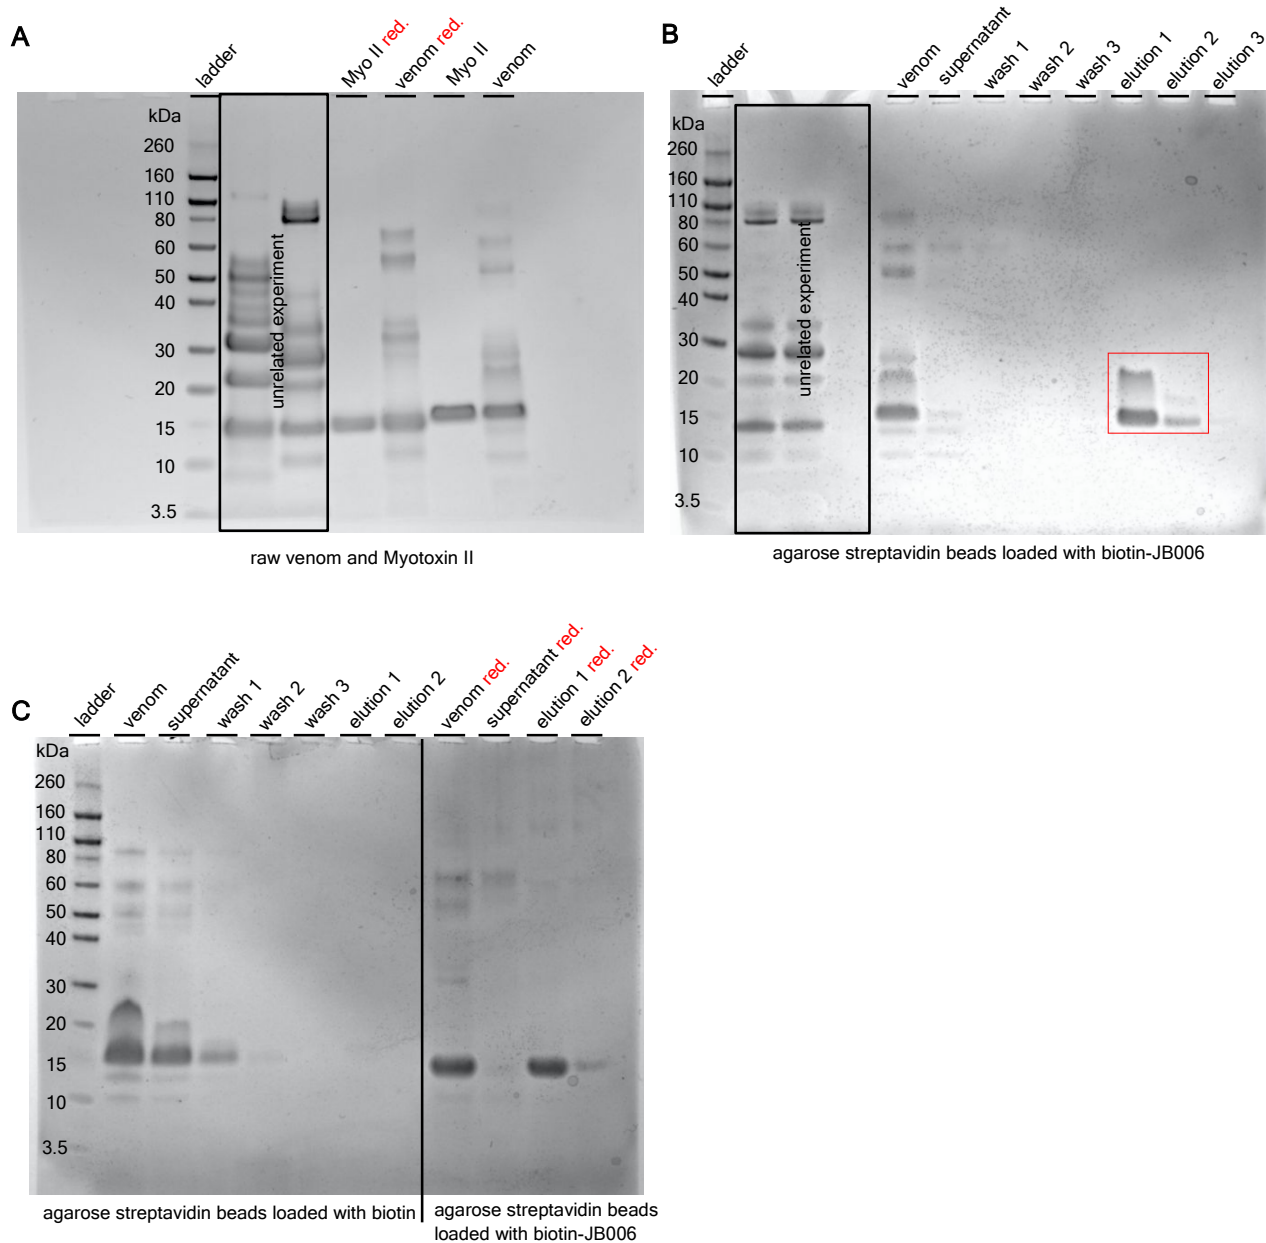

**Figure S2.** SDS-page gels stained with Coomassie blue. **A)** Myotoxin II and *B. asper* crude venom reduced and non-reduced. **B)** Pull-down experiment with agarose streptavidin beads loaded with biotinylated JB006 peptide; lane 5: *B. asper* crude venom (1.0 mg/mL) before incubation, lane 6: supernatant after overnight incubation of *B. asper* crude venom at 4 °C, lane 7–9: washing of beads with PBS buffer, lane 10–12: elution from beads with glycine HCl buffer (0.1 M, pH 2.8). **C)** Pull-down experiment with agarose streptavidin beads loaded with biotin; lane 2: *B. asper* crude venom (1.0 mg/mL) before incubation, lane 3: supernatant after overnight incubation of *B. asper* crude venom at 4 °C, lane 4–6: washing of beads with PBS buffer, lane 7–8: elution from beads with glycine HCl buffer (0.1 M, pH 2.8). Pull-down experiment with agarose streptavidin beads loaded with biotinylated JB006; lane 9: *B. asper* crude venom (1.0 mg/mL) before incubation, reduced, lane 10: supernatant after overnight incubation of *B. asper* crude venom at 4 °C, reduced, lane 11–12: elution from beads with glycine HCl buffer (0.1 M, pH 2.8) after 3 washing steps with PBS buffer, reduced.
